# Supplementary material for: Novel perovskite–spinel composite approach to enhance the magnetization of LaFeO3
Source: Royal Society of Chemistry journal article supplement (doi:10.1039/c4ra11619d), 2015-01-01
Supplement: c4ra11619d1.pdf [file c4ra11619d1.pdf]

## Novel perovskite-spinel composites approach to enhance magnetization of

### LaFeO<sub>3</sub>

### SUPPLEMENTARY MATERIAL

Fig.S1

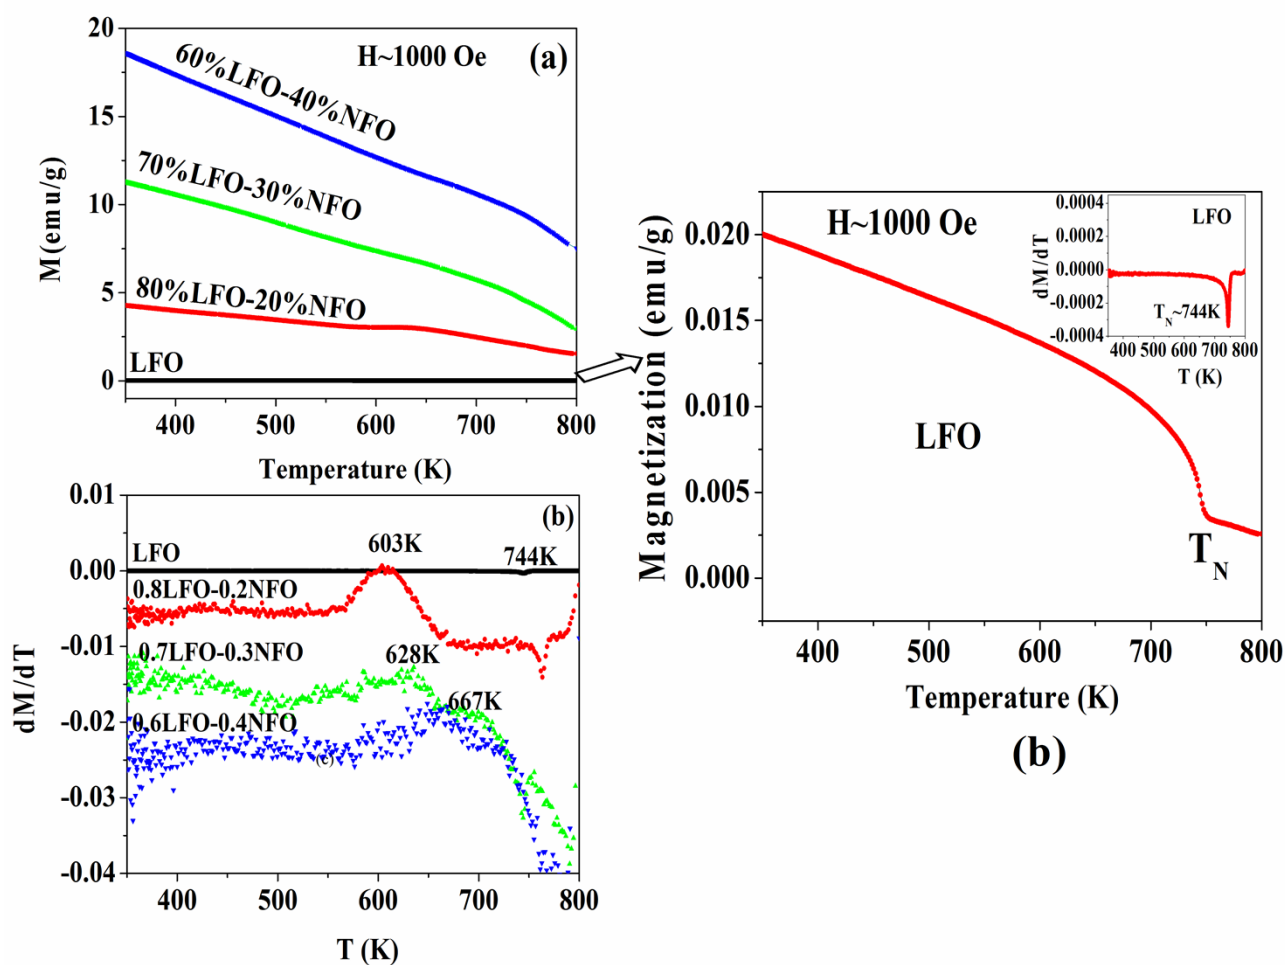

FIG.S1. (a) Temperature dependence magnetization of LFO and LFO-NFO composites at  $H \sim 1$  kOe (b) Enlarge plot of temperature dependence magnetization of LFO at 1kOe plot with inset showing its derivative plot (c)  $dM/dT$  versus temperature plot

Fig.S2

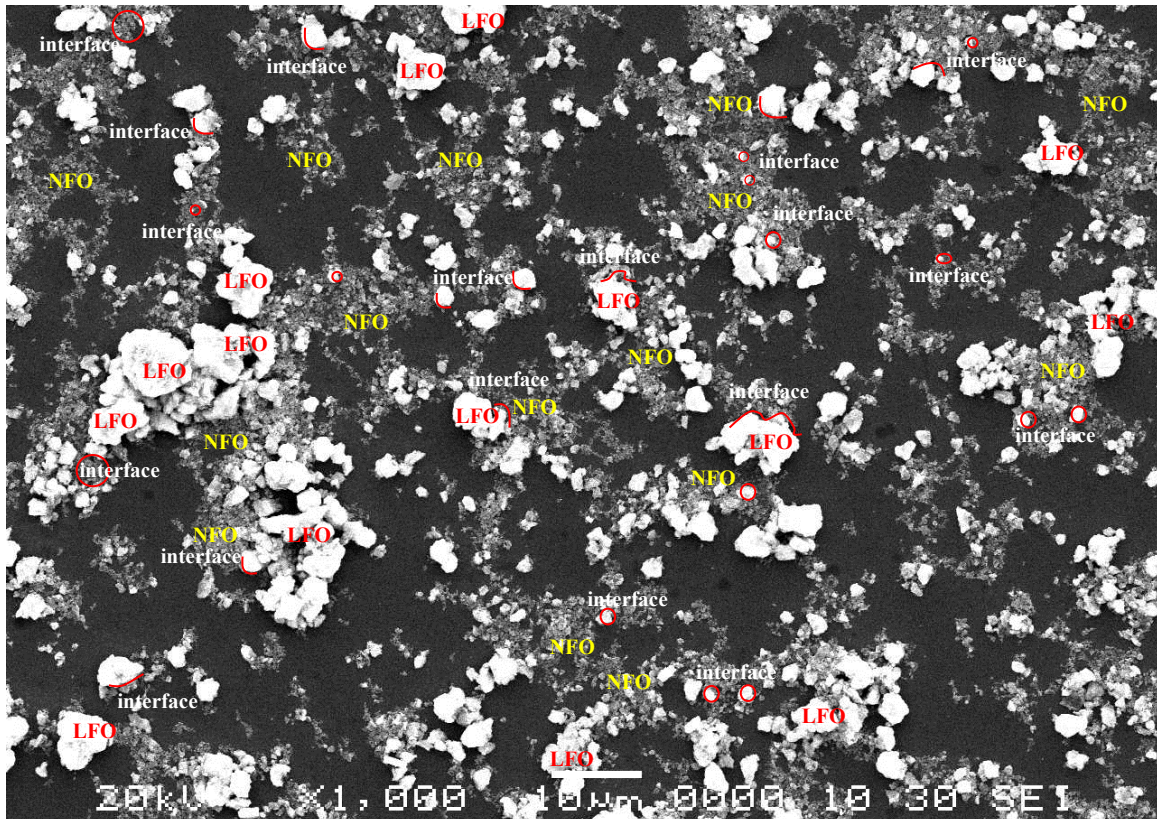

FIG.S2. SEM micrograph of 60%LFO-40%NFO composite
